# Supplementary material for: Scaling of claw sharpness: mechanical constraints reduce attachment performance in larger insects
Source: Oxford University Press journal article supplement (doi:10.1242/jeb.188391), 2018-01-01
Supplement: jeb188391supp.pdf [file jeb188391supp.pdf]

*G. portentosa*

*A. cephalotes*

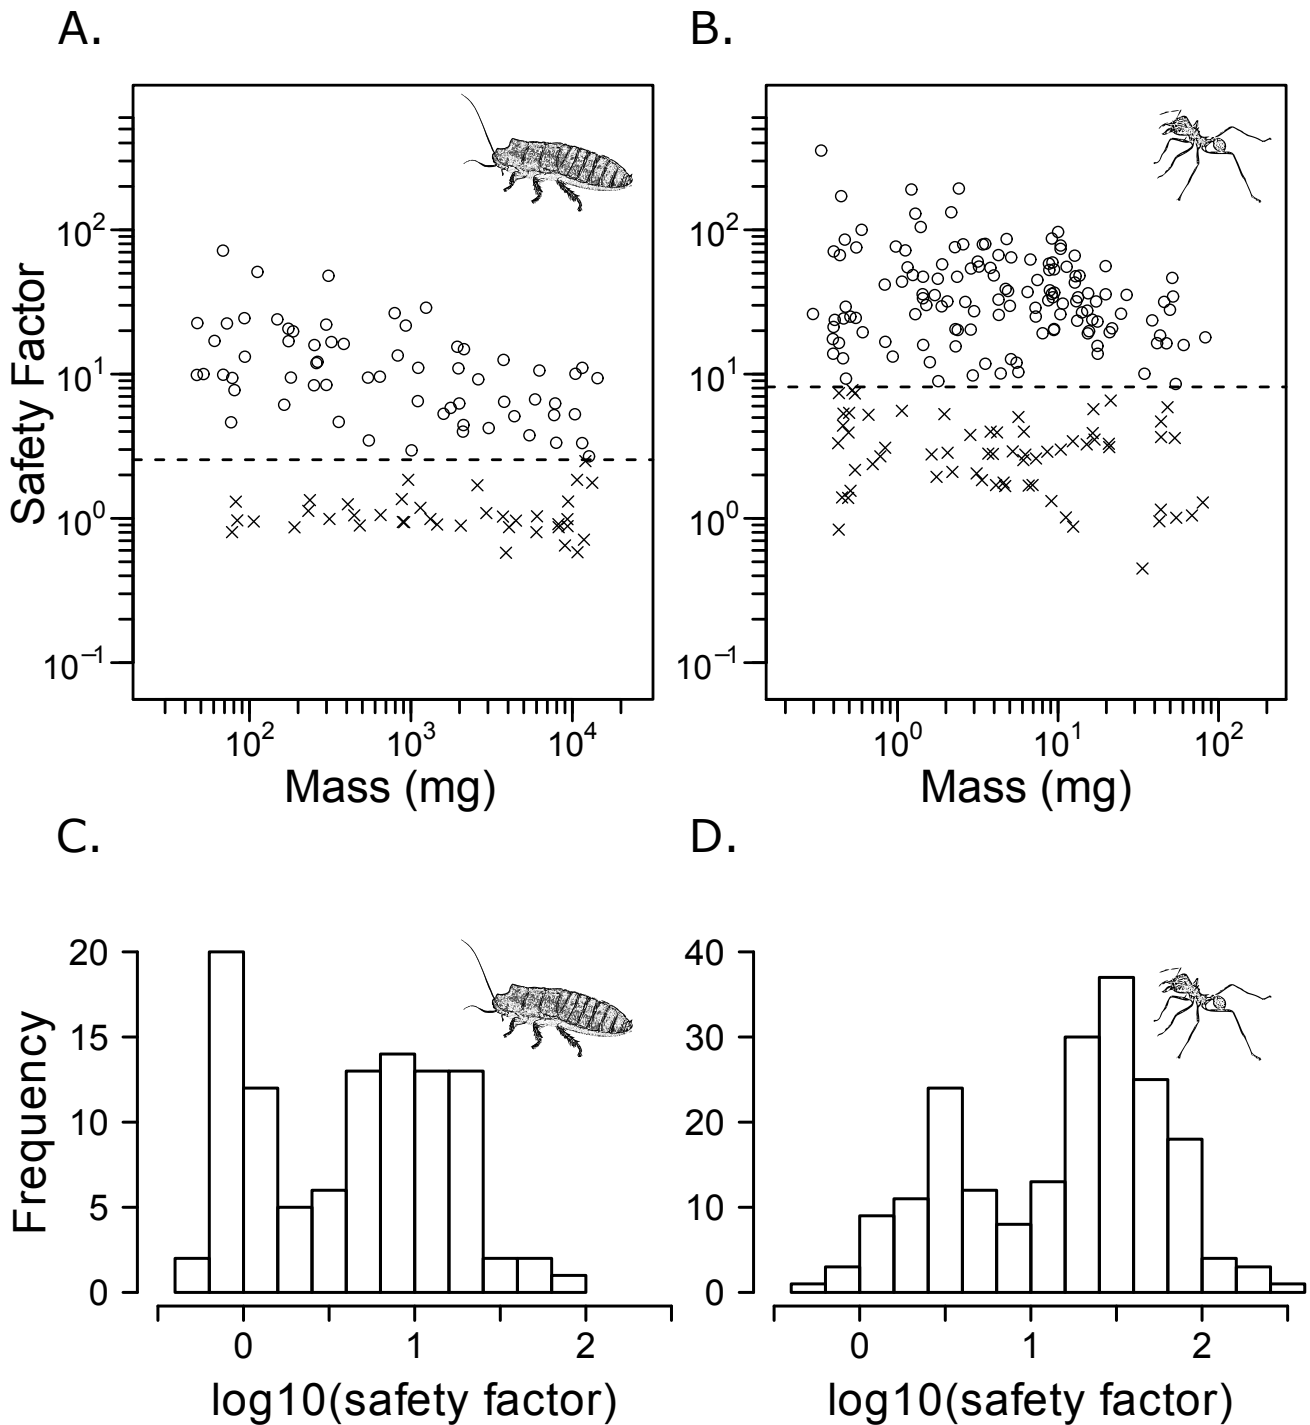

**Figure S1. A & B: Safety factors versus mass and C & D: histograms of safety factor for A. and C. *Gromphadorhina portentosa* (n = 103) and B. & D. *Atta cephalotes* (n = 199) on the centrifuge. For A and B the dashed line indicates separation between those individuals which gripped (circles) and slipped (crosses).**
